# Supplementary material for: Controlled synthesis of high quality type-II/type-I CdS/ZnSe/ZnS core/shell1/shell2 nanocrystals
Source: Royal Society of Chemistry journal article supplement (doi:10.1039/b922130a), 2010-01-01
Supplement: b922130a.pdf [file b922130a.pdf]

**Supporting Information for**  
**Controlled synthesis of high quality type-II/type-I CdS/ZnSe/ZnS**  
**core/shell1/shell2 nanocrystals**

**Jin Zhong Niu, Huaibin Shen, Changhua Zhou, Weiwei Xu, Xiaomin Li,**

**Hongzhe Wang,\* Shiyun Lou, Zuliang Du, Lin Song Li\***

**Table S1** ICP-MS elemental analysis of CdS/ZnSe/ZnS core/shell1/shell2 nanocrystals.

|                         | Sample-1 | Sample-2 | Sample-3 |
|-------------------------|----------|----------|----------|
| Cd ( $\mu\text{g/mL}$ ) | 57.2     | 24.45    | 43.6     |
| Se ( $\mu\text{g/mL}$ ) | 204.8    | 44.5     | 62.7     |
| Zn ( $\mu\text{g/mL}$ ) | 2412.8   | 990.65   | 1048.1   |
| S ( $\mu\text{g/mL}$ )  | 1069.6   | 423.9    | 437.3    |
| Molar ratio of Cd       | 0.70%    | 0.76%    | 1.29%    |

---

*Key Laboratory for Special Functional Materials of Ministry of Education, Henan University, Kaifeng 475004, P.*

*R. China, E-mail: L.S. Li, [lsli@henu.edu.cn](mailto:lsli@henu.edu.cn) and H. Wang, [whz@henu.edu.cn](mailto:whz@henu.edu.cn); Fax: +86-378-3881358; Tel:*

*+86-378-3881358*

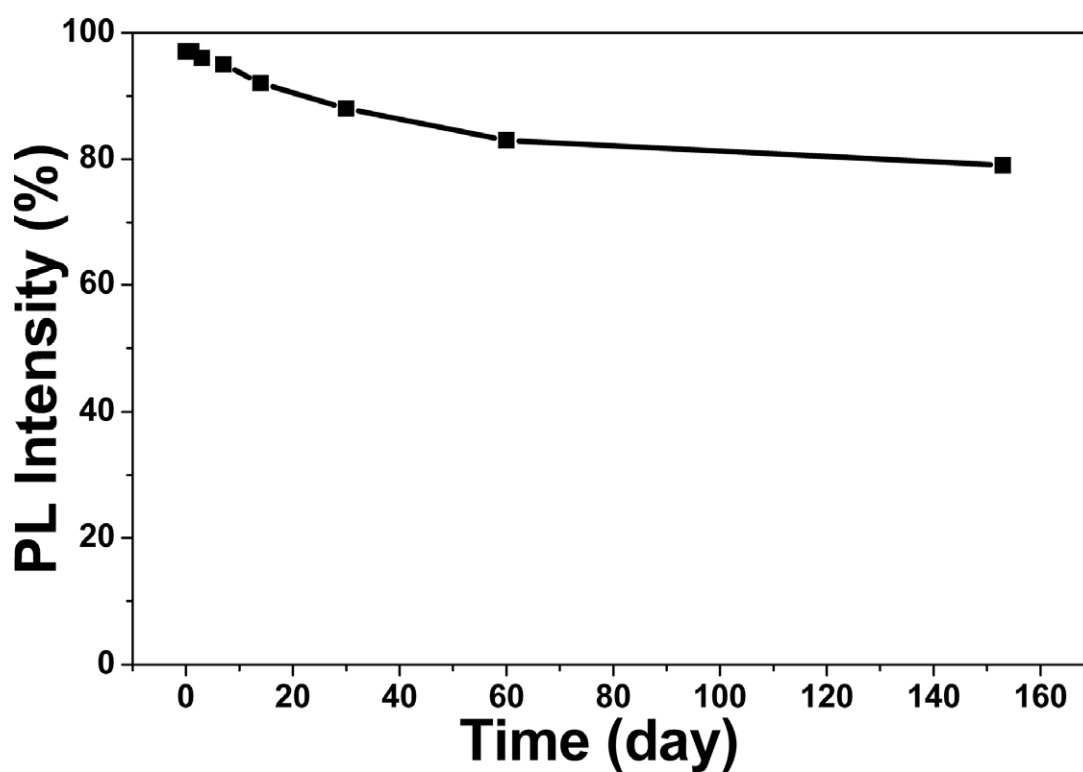

**Fig. S1** Temporal evolution of QYs of water soluble CdS/ZnSe/ZnS nanocrystals after the phase transfer.
